# Supplementary material for: Utilization of Musa acuminata blossom peel waste mediated heterogeneous catalyst for biodiesel production from sesame oil
Source: Royal Society of Chemistry journal article supplement (doi:10.1039/d3su00428g), 2024-01-01
Supplement: d3su00428g1.pdf [file d3su00428g1.pdf]

## Supplementary Data

**S1:** Table for Elemental analysis of BBP catalyst based on EDX analysis

| Elements | Weight % | Atomic % |
|----------|----------|----------|
| C        | 11.92    | 20.20    |
| O        | 43.31    | 55.14    |
| Mg       | 1.90     | 1.59     |
| Si       | 1.57     | 1.14     |
| P        | 2.67     | 1.76     |
| S        | 0.97     | 0.62     |
| K        | 34.26    | 17.85    |
| Ca       | 3.27     | 1.66     |
| Fe       | 0.13     | 0.05     |

**Table S 2:** %yield of Biodiesel at different catalyst loading

| Methanol | Catalyst | Reaction temperature | Total time | Yield% |
|----------|----------|----------------------|------------|--------|
| 9ml      | 0.031gm  | 60°C                 | 52 min     | 90     |
| 9ml      | 0.06gm   | 60°C                 | 40 min     | 94     |
| 9ml      | 0.09gm   | 60°C                 | 32min      | 97     |
| 9ml      | 0.12gm   | 60°C                 | 30min      | 96     |

**Table S 3: %yield of Biodiesel at different methanol/oil ratio**

| Methanol | Catalyst | Reaction temperature | Total time | Yield% |
|----------|----------|----------------------|------------|--------|
| 3ml      | 0.09gm   | 60°C                 | 65 min     | 95     |
| 6ml      | 0.09gm   | 60°C                 | 40 min     | 96.4   |
| 9ml      | 0.09gm   | 60°C                 | 32 min     | 97     |
| 12ml     | 0.09gm   | 60°C                 | 30min      | 97     |

**Table S 4: %yield of Biodiesel with temperature variation**

| Methanol | Catalyst | Reaction temperature | Total time | Yield% |
|----------|----------|----------------------|------------|--------|
| 9ml      | 0.09gm   | 55°C                 | 37 min     | 95     |
| 9ml      | 0.09gm   | 60°C                 | 32 min     | 97     |
| 9ml      | 0.09gm   | 65°C                 | 30 min     | 97.2   |
| 9ml      | 0.09gm   | 70°C                 | 52min      | 96     |

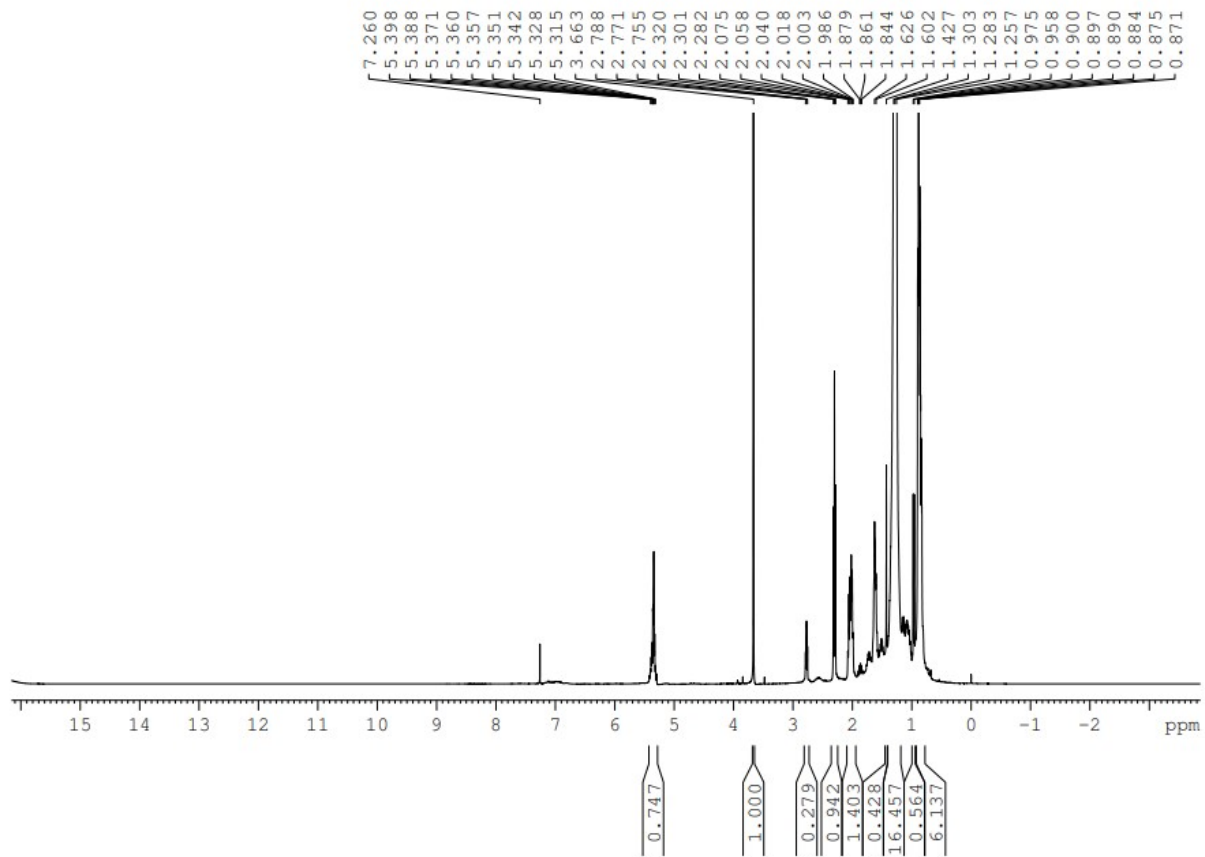

S5.  $^1\text{H}$  NMR spectrum of biodiesel obtained from sesame oil

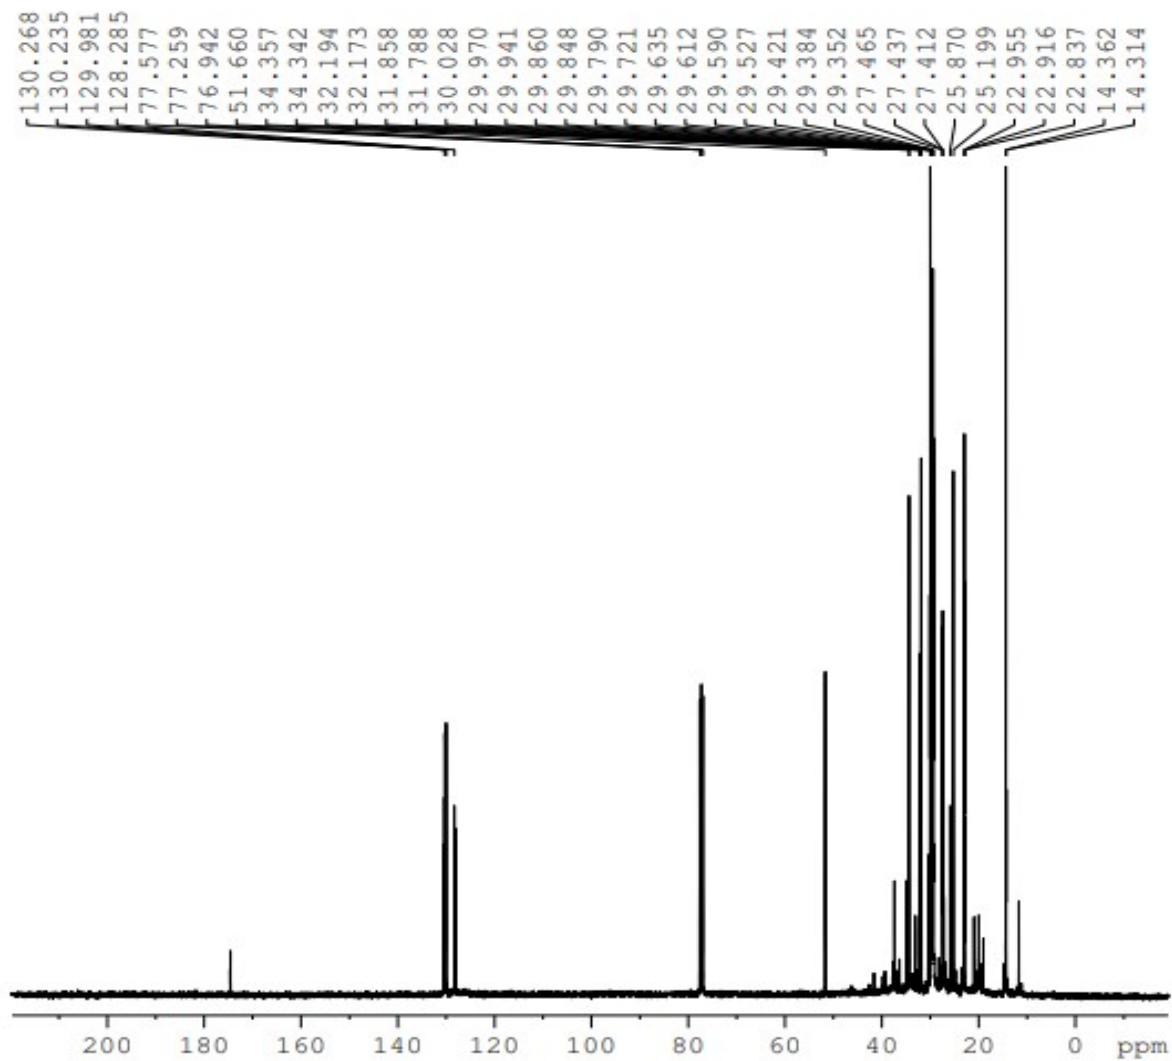

S6.  $^{13}\text{C}$  NMR spectrum of biodiesel obtained from sesame oil

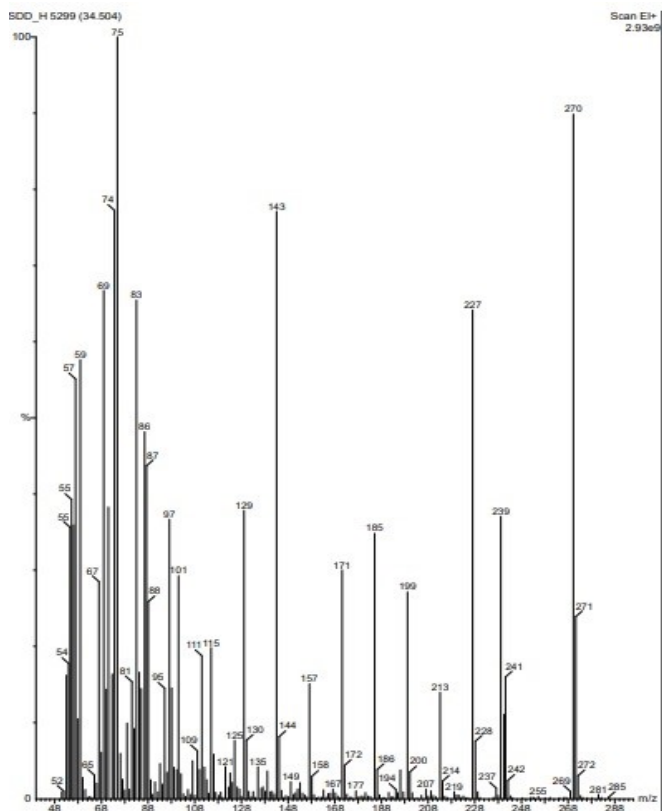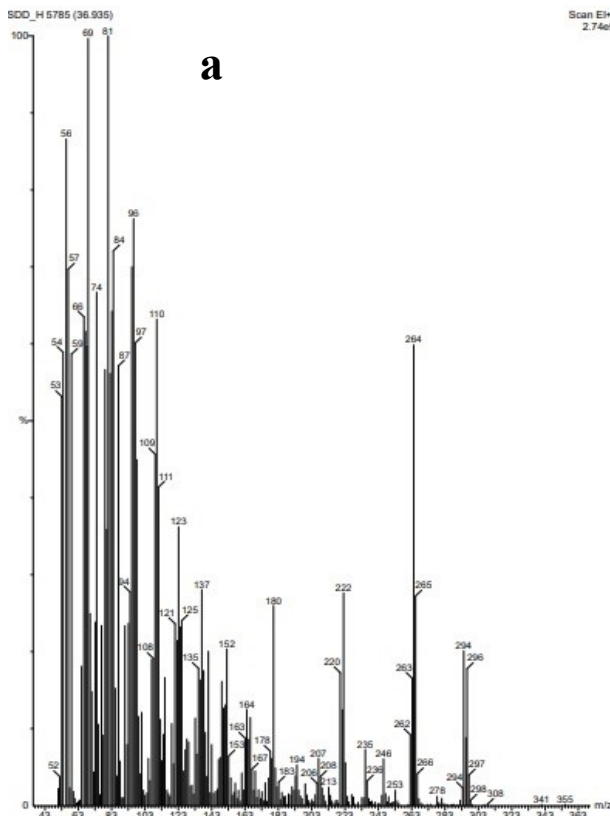

**a**

S7. Mass spectrum of (a) Methyl palmitate & (b) Methyl linoleate
